# Supplementary material for: Defect passivation and electron band energy regulation of a ZnO electron transport layer through synergetic bifunctional surface engineering for efficient quantum dot light-emitting diodes
Source: Royal Society of Chemistry journal article supplement (doi:10.1039/d3nr01194a), 2023-01-01
Supplement: d3nr01194a1.pdf [file d3nr01194a1.pdf]

## Supplementary Information

### Defect Passivation and Electron Band Energy Regulation of ZnO Electron Transport Layer through a Synergetic Bifunctional Surface Engineering for Efficient Quantum Dot Light-Emitting Diodes

Fensha Cai,<sup>a</sup> Yufei Tu,<sup>b</sup> Dadi Tian,<sup>a</sup> Yan Fang,<sup>a</sup> Bo Hou,<sup>c</sup> Muhammad Ishaq,<sup>d</sup>  
Xiaohong Jiang,<sup>a</sup> Meng Li,<sup>a</sup> Shujie Wang,<sup>\*a</sup> Zuliang Du<sup>\*a</sup>

<sup>a</sup>Key Lab for Special Functional Materials of Ministry of Education, National & Local Joint Engineering Research Center for High-efficiency Display and Lighting Technology, School of Materials Science and Engineering, and Collaborative Innovation Center of Nano Functional Materials and Applications, Henan University, Kaifeng 475004, China  
E-mail: wsj@henu.edu.cn, zld@henu.edu.cn

<sup>b</sup>School of Electronics Information and Intelligent Manufacturing, Sias University, Xinzheng, China

<sup>c</sup>School of Physics and Astronomy, Cardiff University, Cardiff, Wales, CF24 3AA, UK

<sup>d</sup>Institute of Fundamental and Frontier Sciences, University of Electronic Science and Technology of China, Chengdu 610054, China

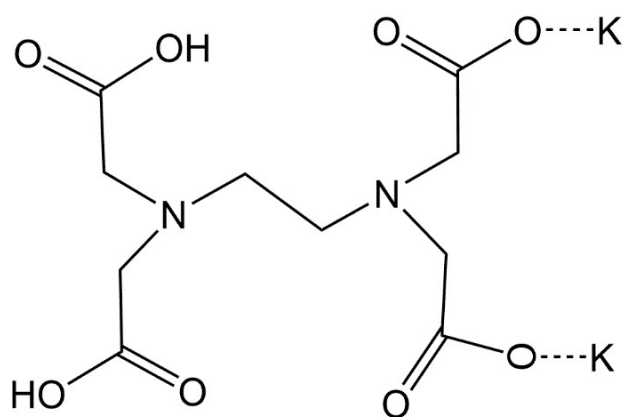

**Fig. S1** Molecular structures of EDTAK.

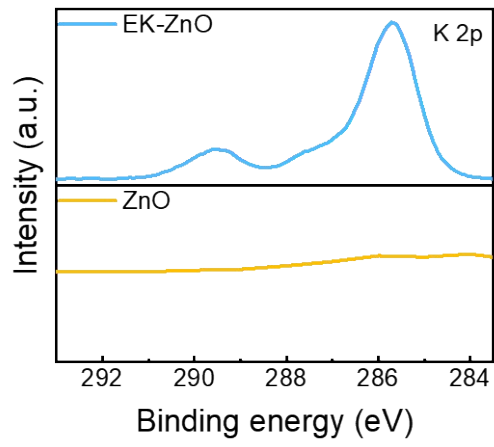

**Fig. S2** XPS spectra of K 2p.

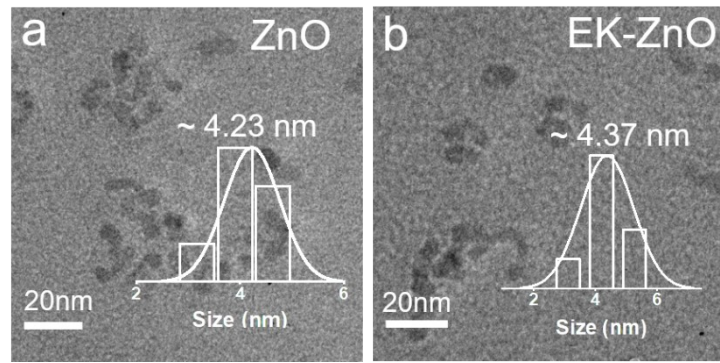

**Fig. S3** TEM images of ZnO and EK-ZnO NPs. Insets, corresponding size distribution histogram.

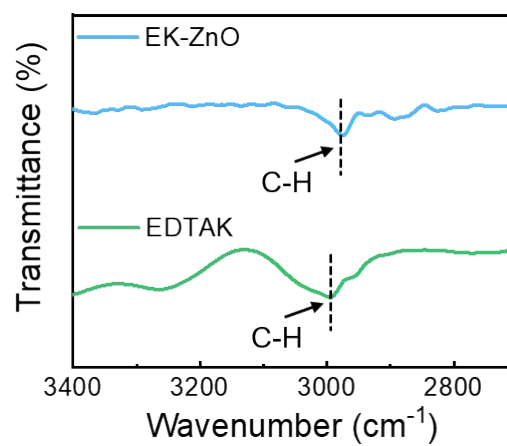

**Fig. S4** FTIR of EDTAK and EK-ZnO NPs.

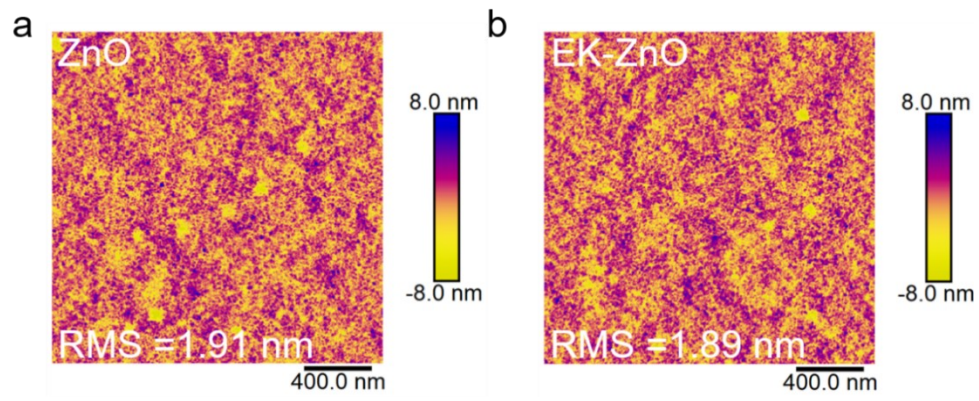

**Fig. S5** AFM images of ZnO and EK-ZnO films on glass substrate.

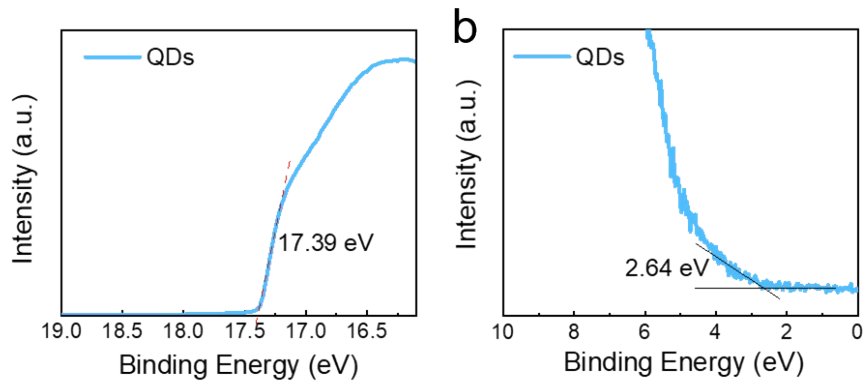

**Figure S6.** UPS spectra of QDs film on ITO.

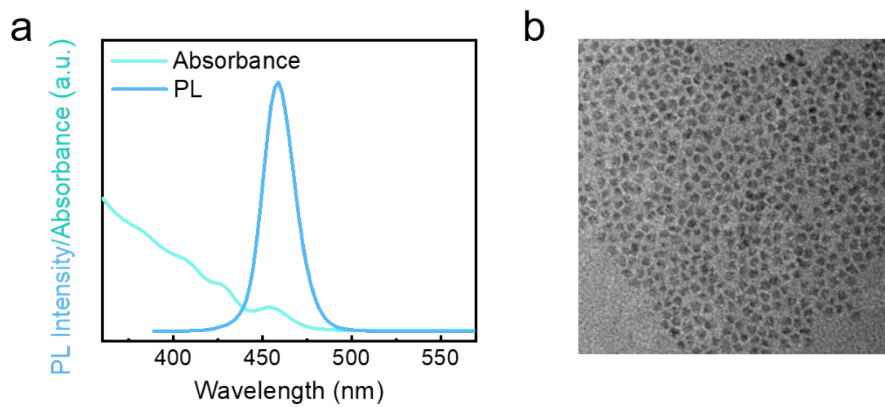

**Fig. S7** (a) UV-vis absorption and PL spectra of the CdSe/ZnSe/ZnS QDs. (b) TEM image of CdSe/ZnSe/ZnS QDs.

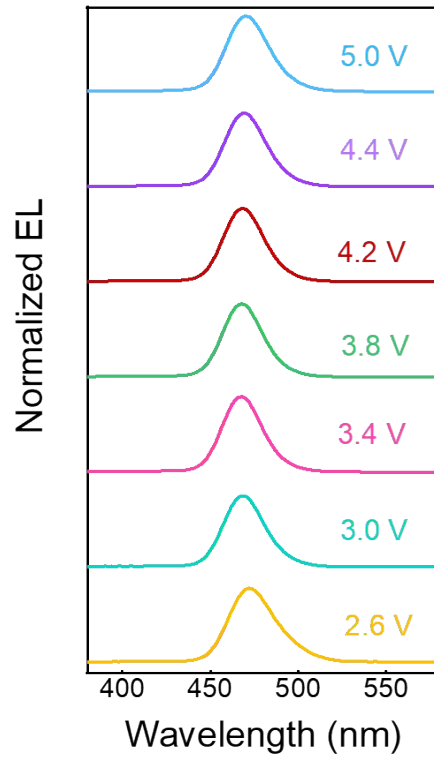

**Fig. S8** EL spectra of the QLED with EK-ZnO under an applied voltage of 3.0-5.0 V.



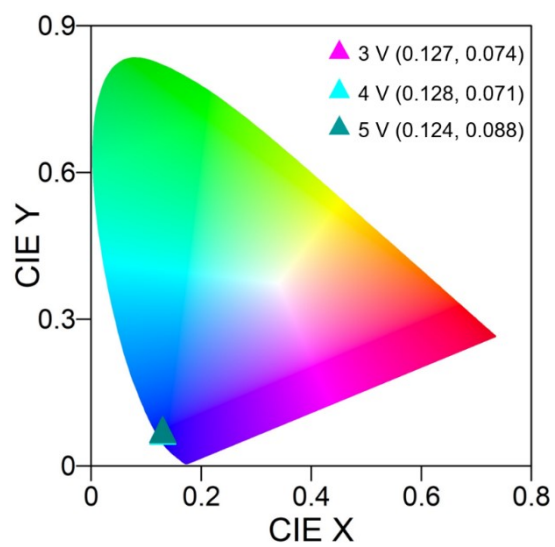

**Fig. S9** CIE coordinates of QLEDs based on EK-ZnO ETL under an applied voltage of 3.0-5.0 V.

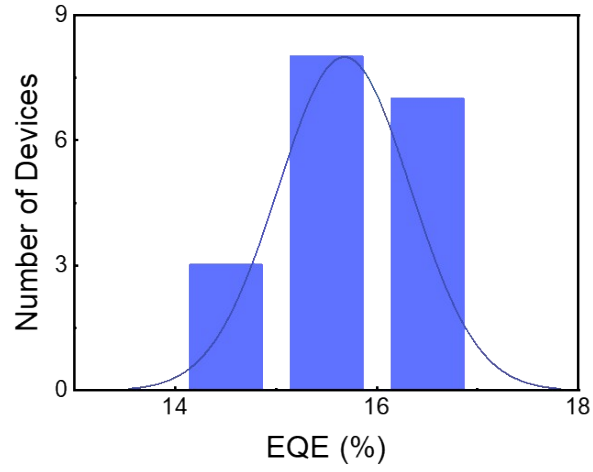

**Fig. S10** EQE histogram of 18 devices based on EK-ZnO ETL. The fitting curve is a distribution function curve.

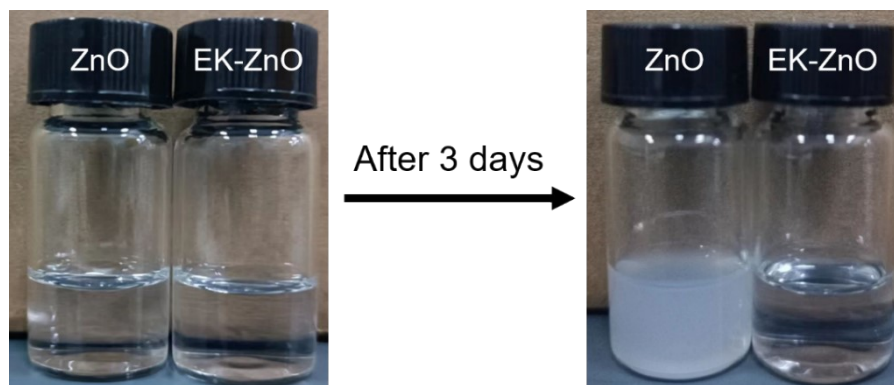

**Fig. S11** Photo-graphs of ZnO and EK-ZnO nanoparticle solutions in air.

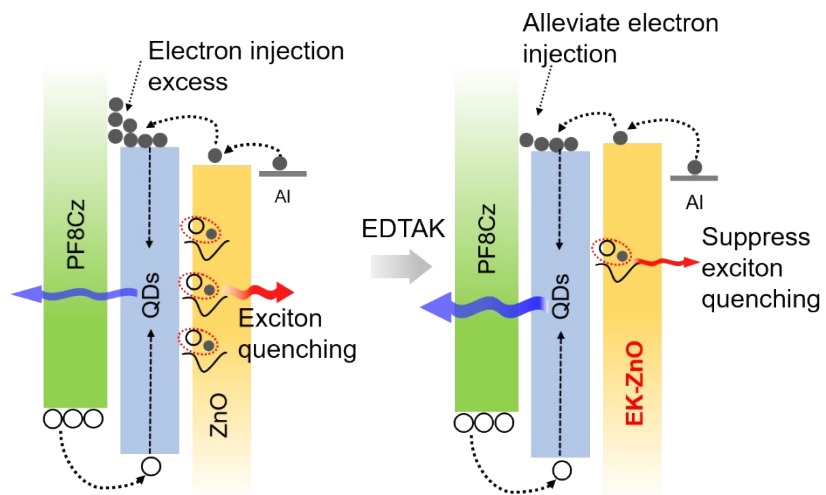

**Fig. S12** Schematic of performance enhancement for devices with primordial ZnO and additives-treatment ZnO films.

**Table S1** Kinetic parameters obtained from TRPL spectra of Blue QDs deposited on Various substrates.

|                   | $\tau_1$<br>(ns) | $A_1$<br>(%) | $\tau_2$<br>(ns) | $A_2$<br>(%) | $\tau_{avg}$<br>(ns) |
|-------------------|------------------|--------------|------------------|--------------|----------------------|
| Quartz/QDs        | 0.67             | 17.17        | 6.96             | 82.83        | 5.88                 |
| Quartz/QDs/ZnO    | 0.67             | 30.55        | 5.97             | 69.45        | 4.35                 |
| Quartz/QDs/EK-ZnO | 0.71             | 23.88        | 6.52             | 76.12        | 5.13                 |

**Table S2** Detailed parameters extracted from the UPS and absorption spectra for ZnO and EK-ZnO films.

|        | Eonset<br>(eV) | Ecutoff<br>(eV) | WF<br>(eV) | VBM<br>(eV) | Eg<br>(eV) | CBM<br>(eV) |
|--------|----------------|-----------------|------------|-------------|------------|-------------|
| ZnO    | 3.69           | 17.42           | 3.80       | 7.49        | 3.52       | 3.97        |
| EK-ZnO | 3.65           | 17.69           | 3.53       | 7.18        | 3.49       | 3.69        |
